# Supplementary material for: Impact of Consuming Extra-Virgin Olive Oil or Nuts within a Mediterranean Diet on DNA Methylation in Peripheral White Blood Cells within the PREDIMED-Navarra Randomized Controlled Trial: A Role for Dietary Lipids
Source: PubMed Central journal article supplement (PMC5793243; doi:10.3390/nu10010015), 2017-12-23
Supplement: nutrients-10-00015-s001.pdf [file nutrients-10-00015-s001.pdf]

**Table S1. Pearson correlation values of differences in types of leukocytes and consumption at 5 years of extra-virgin olive oil (EVOO) and nuts, and methylation changes of cg01081343 and cg17071192.**

| <b>Correlation</b>                | <b>r</b> | <b>p-value</b> |
|-----------------------------------|----------|----------------|
| <b>cg01081343 vs.</b>             |          |                |
| Leukocytes                        | 0.042    | 0.842          |
| Lymphocytes                       | 0.048    | 0.821          |
| Monocytes                         | 0.250    | 0.228          |
| Neutrophils                       | -0.134   | 0.522          |
| Eosinophils                       | 0.060    | 0.777          |
| Basophils                         | 0.096    | 0.649          |
| <b>cg17071192 vs.</b>             |          |                |
| Leukocytes                        | 0.245    | 0.237          |
| Lymphocytes                       | -0.289   | 0.161          |
| Monocytes                         | 0.196    | 0.348          |
| Neutrophils                       | 0.184    | 0.378          |
| Eosinophils                       | 0.148    | 0.481          |
| Basophils                         | -0.016   | 0.939          |
| <b>Nuts vs.</b>                   |          |                |
| Leukocytes                        | 0.386    | 0.062          |
| Lymphocytes                       | 0.023    | 0.916          |
| Monocytes                         | 0.302    | 0.152          |
| Neutrophils                       | -0.078   | 0.719          |
| Eosinophils                       | -0.115   | 0.593          |
| Basophils                         | 0.012    | 0.955          |
| <b>Extra-virgin olive oil vs.</b> |          |                |
| Leukocytes                        | -0.097   | 0.653          |
| Lymphocytes                       | -0.103   | 0.634          |
| Monocytes                         | -0.235   | 0.268          |
| Neutrophils                       | -0.227   | 0.286          |
| Eosinophils                       | -0.249   | 0.242          |
| Basophils                         | 0.003    | 0.989          |

Correlation values were obtained after Pearson correlations.  
p<0.05 is considered significant.

**Table S2. Differences among dietary groups in the composition of blood cells.**

|             | <b>p-value ANOVA</b> | <b>p-value</b><br><b>Low-fat vs. MedDiet+EVOO</b> | <b>p-value</b><br><b>Low-fat vs. MedDiet+nuts</b> | <b>p-value</b><br><b>MedDiet+EVOO vs. MedDiet+nuts</b> |
|-------------|----------------------|---------------------------------------------------|---------------------------------------------------|--------------------------------------------------------|
| Leukocytes  | 0.118                |                                                   |                                                   |                                                        |
| Lymphocytes | 0.065                |                                                   |                                                   |                                                        |
| Monocytes   | 0.963                |                                                   |                                                   |                                                        |
| Neutrophils | 0.049                | 0.077                                             | 0.997                                             | 0.089                                                  |
| Eosinophils | 0.290                |                                                   |                                                   |                                                        |
| Basophils   | 0.354                |                                                   |                                                   |                                                        |

Statistical analysis was performed using ANOVA (+ Tukey's multiple comparison test). p<0.05 is considered significant.

**Table S3. Canonical pathways (Ingenuity Pathway Analysis) associated with differentially methylated CpGs selected from MedDiet+EVOO vs. low-fat control diet LIMMA analysis.**

| Ingenuity Canonical Pathways                               | $-\log(p\text{-value})$ | Ratio    | Genes                                              |
|------------------------------------------------------------|-------------------------|----------|----------------------------------------------------|
| Hepatic Fibrosis / Hepatic Stellate Cell Activation        | 2,76E00                 | 3,83E-02 | TLR4,COL19A1,PROK1,IFNGR2,COL20A1,COL11A2,TNFRSF1B |
| Fatty Acid Activation                                      | 2,20E00                 | 1,54E-01 | SLC27A5,ACSBG2                                     |
| Crosstalk between Dendritic Cells and Natural Killer Cells | 2,01E00                 | 4,49E-02 | TLR4,FSCN2,TNFRSF1B,CAMK2B                         |
| Aryl Hydrocarbon Receptor Signaling                        | 1,99E00                 | 3,57E-02 | AHRR,NFIC,POLA1,ALDH1A2,ALDH3B2                    |
| $\gamma$ -linolenate Biosynthesis II (Animals)             | 1,97E00                 | 1,18E-01 | SLC27A5,ACSBG2                                     |
| Mitochondrial L-carnitine Shuttle Pathway                  | 1,97E00                 | 1,18E-01 | SLC27A5,ACSBG2                                     |
| LPS/IL-1 Mediated Inhibition of RXR Function               | 1,73E00                 | 2,70E-02 | TLR4,SLC27A5,ALDH1A2,ACSBG2,TNFRSF1B,ALDH3B2       |
| Fatty Acid $\beta$ -oxidation I                            | 1,44E00                 | 6,25E-02 | SLC27A5,ACSBG2                                     |
| Uracil Degradation II (Reductive)                          | 1,43E00                 | 2,50E-01 | DPYD                                               |
| Thymine Degradation                                        | 1,43E00                 | 2,50E-01 | DPYD                                               |
| Leukocyte Extravasation Signaling                          | 1,32E00                 | 2,38E-02 | MMP28,RAP1GAP,CLDN16,DLC1,CLDN22                   |

Ratio represents differentially methylated genes/genes in the pathway. A  $-\log(p\text{-value}) > 1.301$  is considered significant, which corresponds to a  $p < 0.05$ . CpG: CG site; EVOO: extra-virgin olive oil; LIMMA: Linear Models for Microarray Data; MedDiet: Mediterranean diet

**Table S4. Canonical pathways (Ingenuity Pathway Analysis) associated with differentially methylated CpGs selected from MedDiet+nuts vs. low-fat control diet LIMMA analysis.**

| Ingenuity Canonical Pathways                               | -log(p-value) | Ratio    | Genes                                                                                                   |
|------------------------------------------------------------|---------------|----------|---------------------------------------------------------------------------------------------------------|
| Axonal Guidance Signaling                                  | 2,78E00       | 3,56E-02 | PIK3C2B,FYN,PLXNC1,GNAS,SEMA5A,EPHA4,PLCH2,PRKCZ,NFATC1,WNT10A,SRGAP1,PRKAG2,PLXNB2,ABLIM2,LNPEP,SHANK2 |
| Sperm Motility                                             | 2,49E00       | 5,60E-02 | NPPB,PDE2A,GNAS,CACNA1H,PRKAG2,PLCH2,PRKCZ                                                              |
| Sumoylation Pathway                                        | 2,44E00       | 6,25E-02 | TP53,ETS1,DAXX,AR,CEBPA,MAP3K5                                                                          |
| Role of p14/p19ARF in Tumor Suppression                    | 2,38E00       | 9,30E-02 | TP53,RB1,PIK3C2B,TTF1                                                                                   |
| Myc Mediated Apoptosis Signaling                           | 2,35E00       | 7,14E-02 | TP53,PIK3C2B,IGF1R,PRKCZ,BCL2                                                                           |
| Adipogenesis pathway                                       | 2,33E00       | 5,22E-02 | TP53,HDAC9,ZNF423,NR1D2,EBF1,HDAC4,CEBPA                                                                |
| SAPK/JNK Signaling                                         | 2,27E00       | 5,77E-02 | TP53,PIK3C2B,DAXX,DUSP10,MAP3K5,NFATC1                                                                  |
| Molecular Mechanisms of Cancer                             | 2,27E00       | 3,48E-02 | TP53,RB1,FYN,DAXX,SYNGAP1,PIK3C2B,GNAS,WNT10A,PRKAG2,RBPJ,MAP3K5,PRKCZ,BCL2                             |
| p53 Signaling                                              | 2,13E00       | 5,41E-02 | TP53,HDAC9,RB1,PIK3C2B,COQ8A,BCL2                                                                       |
| Telomerase Signaling                                       | 2,13E00       | 5,41E-02 | TP53,ETS1,HDAC9,RB1,PIK3C2B,HDAC4                                                                       |
| Growth Hormone Signaling                                   | 2,09E00       | 6,17E-02 | PIK3C2B,CEBPA,IGF1R,RPS6KA2,PRKCZ                                                                       |
| Neuropathic Pain Signaling In Dorsal Horn Neurons          | 2,08E00       | 5,26E-02 | PIK3C2B,GRM8,GRIA1,PRKAG2,PLCH2,PRKCZ                                                                   |
| Unfolded protein response                                  | 2,03E00       | 7,41E-02 | PDIA2,CEBPA,MAP3K5,BCL2                                                                                 |
| Role of NFAT in Cardiac Hypertrophy                        | 2,01E00       | 4,17E-02 | HDAC9,PIK3C2B,HDAC4,GNAS,PRKAG2,IGF1R,PLCH2,PRKCZ                                                       |
| Synaptic Long Term Potentiation                            | 1,98E00       | 5,00E-02 | GRM8,GRIA1,PRKAG2,PPP1R14A,PLCH2,PRKCZ                                                                  |
| Induction of Apoptosis by HIV1                             | 1,87E00       | 6,67E-02 | TP53,DAXX,MAP3K5,BCL2                                                                                   |
| Prostate Cancer Signaling                                  | 1,83E00       | 5,32E-02 | TP53,RB1,PIK3C2B,AR,BCL2                                                                                |
| Melanocyte Development and Pigmentation Signaling          | 1,81E00       | 5,26E-02 | PIK3C2B,GNAS,PRKAG2,RPS6KA2,BCL2                                                                        |
| Cell Cycle: G1/S Checkpoint Regulation                     | 1,77E00       | 6,25E-02 | TP53,HDAC9,RB1,HDAC4                                                                                    |
| Protein Kinase A Signaling                                 | 1,73E00       | 3,06E-02 | PDE2A,GNAS,PPP1R1B,DUSP10,MYLK2,PTPRS,PRKAG2,PPP1R14A,PLCH2,NFATC1,PRKCZ,DUSP16                         |
| Notch Signaling                                            | 1,69E00       | 7,89E-02 | NOTCH4,RBPJ,DLL3                                                                                        |
| Aryl Hydrocarbon Receptor Signaling                        | 1,67E00       | 4,29E-02 | TP53,AHRR,RB1,RARA,POLA1,ALDH3A1                                                                        |
| Netrin Signaling                                           | 1,66E00       | 7,69E-02 | PRKAG2,ABLIM2,NFATC1                                                                                    |
| Chronic Myeloid Leukemia Signaling                         | 1,66E00       | 4,81E-02 | TP53,HDAC9,RB1,PIK3C2B,HDAC4                                                                            |
| Hepatic Fibrosis / Hepatic Stellate Cell Activation        | 1,64E00       | 3,83E-02 | COL19A1,COL23A1,COL9A3,IGF1R,COL18A1,COL11A2,BCL2                                                       |
| CREB Signaling in Neurons                                  | 1,62E00       | 3,80E-02 | PIK3C2B,GNAS,GRM8,GRIA1,PRKAG2,PLCH2,PRKCZ                                                              |
| Ovarian Cancer Signaling                                   | 1,62E00       | 4,17E-02 | TP53,RB1,PIK3C2B,WNT10A,PRKAG2,BCL2                                                                     |
| Synaptic Long Term Depression                              | 1,60E00       | 4,11E-02 | GNAS,GRM8,GRIA1,IGF1R,PLCH2,PRKCZ                                                                       |
| Glioma Signaling                                           | 1,56E00       | 4,55E-02 | TP53,RB1,PIK3C2B,IGF1R,PRKCZ                                                                            |
| Mitochondrial L-carnitine Shuttle Pathway                  | 1,56E00       | 1,18E-01 | SLC27A2,CPT1B                                                                                           |
| Superpathway of Inositol Phosphate Compounds               | 1,55E00       | 3,42E-02 | PIK3C2B,FYN,PHOSPHO1,PPP1R1B,DUSP10,PPP1R14A,PLCH2,DUSP16                                               |
| β-alanine Degradation I                                    | 1,52E00       | 5,00E-01 | ABAT                                                                                                    |
| Valine Degradation I                                       | 1,52E00       | 1,11E-01 | ABAT,HIBADH                                                                                             |
| Cyclins and Cell Cycle Regulation                          | 1,49E00       | 5,13E-02 | TP53,HDAC9,RB1,HDAC4                                                                                    |
| Role of Oct4 in Mammalian Embryonic Stem Cell Pluripotency | 1,48E00       | 6,52E-02 | TP53,RB1,RARA                                                                                           |
| DNA damage-induced 14-3-3σ Signaling                       | 1,47E00       | 1,05E-01 | TP53,HUS1                                                                                               |
| 3-phosphoinositide Biosynthesis                            | 1,46E00       | 3,52E-02 | PIK3C2B,FYN,PHOSPHO1,PPP1R1B,DUSP10,PPP1R14A,DUSP16                                                     |
| NGF Signaling                                              | 1,46E00       | 4,27E-02 | TP53,PIK3C2B,RPS6KA2,MAP3K5,PRKCZ                                                                       |
| p38 MAPK Signaling                                         | 1,46E00       | 4,27E-02 | TP53,DAXX,DUSP10,RPS6KA2,MAP3K5                                                                         |
| Glioblastoma Multifforme Signaling                         | 1,44E00       | 3,77E-02 | TP53,RB1,PIK3C2B,WNT10A,IGF1R,PLCH2                                                                     |
| D-myo-inositol-5-phosphate Metabolism                      | 1,42E00       | 3,73E-02 | PHOSPHO1,PPP1R1B,DUSP10,PPP1R14A,PLCH2,DUSP16                                                           |
| Dopamine-DARPP32 Feedback in cAMP Signaling                | 1,41E00       | 3,70E-02 | GNAS,PPP1R1B,PRKAG2,PPP1R14A,PLCH2,PRKCZ                                                                |
| Role of Tissue Factor in Cancer                            | 1,40E00       | 4,10E-02 | TP53,PDIA2,PIK3C2B,FYN,RPS6KA2                                                                          |
| Small Cell Lung Cancer Signaling                           | 1,39E00       | 4,76E-02 | TP53,RB1,PIK3C2B,BCL2                                                                                   |
| GPCR-Mediated Nutrient Sensing in Enteroendocrine Cells    | 1,38E00       | 4,71E-02 | GNAS,PRKAG2,PLCH2,PRKCZ                                                                                 |
| Fatty Acid α-oxidation                                     | 1,35E00       | 9,09E-02 | ALOX12B,ALDH3A1                                                                                         |
| Thyroid Hormone Biosynthesis                               | 1,34E00       | 3,33E-01 | TPO                                                                                                     |
| 4-aminobutyrate Degradation I                              | 1,34E00       | 3,33E-01 | ABAT                                                                                                    |
| Docosahexaenoic Acid (DHA) Signaling                       | 1,34E00       | 5,77E-02 | PIK3C2B,BIK,BCL2                                                                                        |
| Type II Diabetes Mellitus Signaling                        | 1,33E00       | 3,94E-02 | PIK3C2B,SLC27A2,PRKAG2,MAP3K5,PRKCZ                                                                     |
| HER-2 Signaling in Breast Cancer                           | 1,33E00       | 4,55E-02 | TP53,PIK3C2B,MAP3K5,PRKCZ                                                                               |
| Gap Junction Signaling                                     | 1,32E00       | 3,53E-02 | PIK3C2B,DBN1,GNAS,PRKAG2,PLCH2,PRKCZ                                                                    |

Ratio represents differentially methylated genes/genes in the pathway. A  $-\log(p\text{-value}) > 1.301$  is considered significant, which corresponds to a  $p < 0.05$ . CpG: CG site; LIMMA: Linear Models for Microarray Data; MedDiet: Mediterranean diet
